# Supplementary material
Source: PubMed Central journal article supplement (PMC1276063)

**A**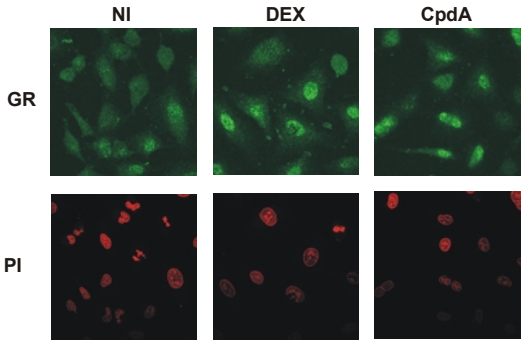**B**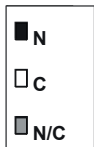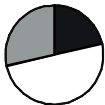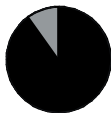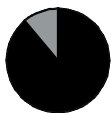

Supplement: pnas_0505554102_1.pdf [file pnas_0505554102_1.pdf]

**A**

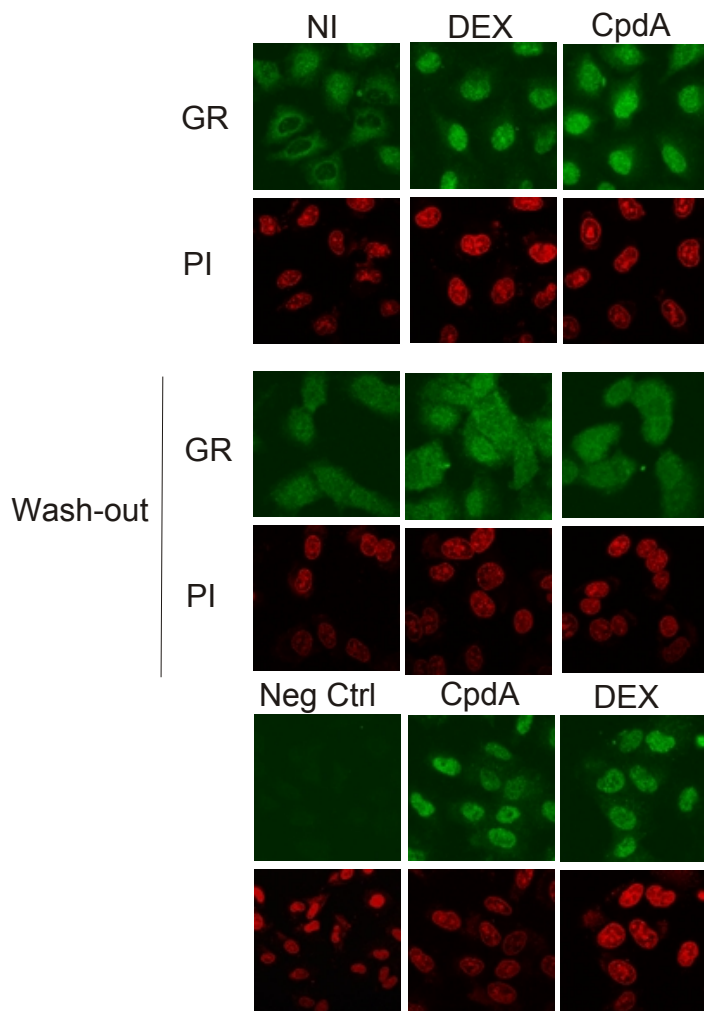

**B**

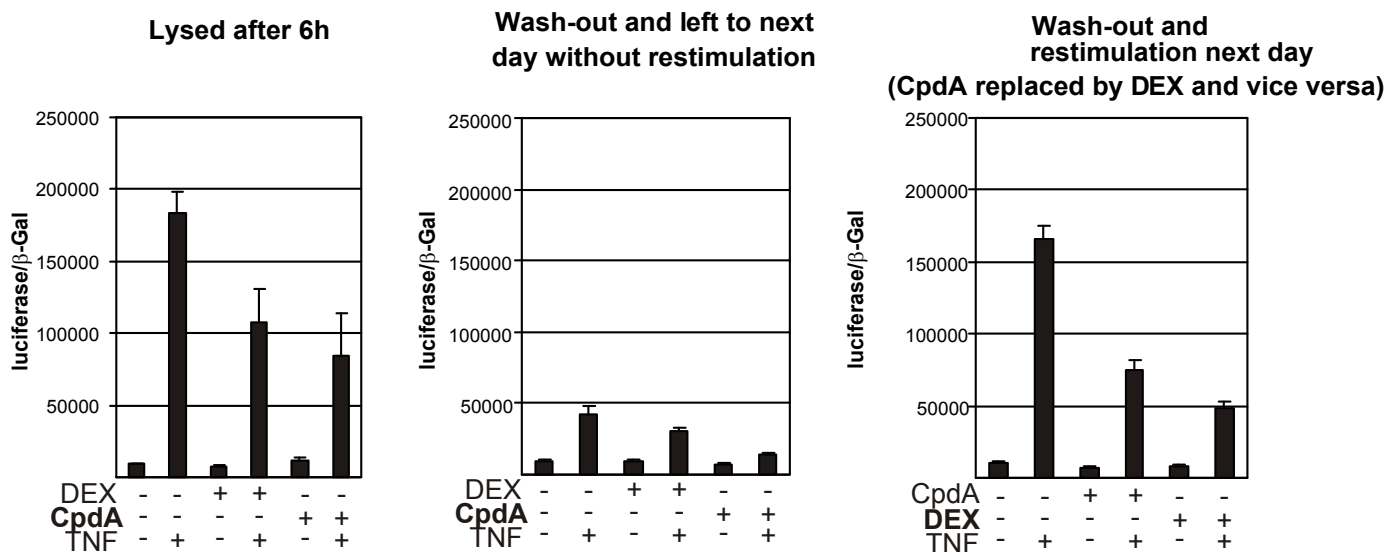

Supplement: pnas_0505554102_2.pdf [file pnas_0505554102_2.pdf]

**A**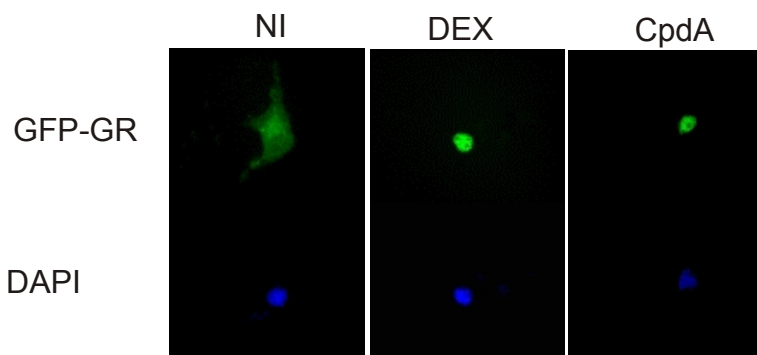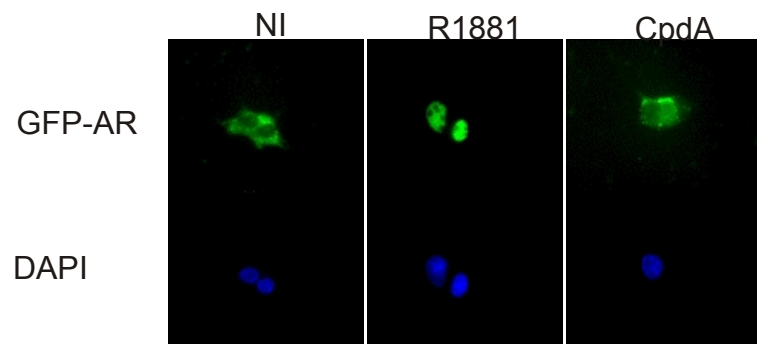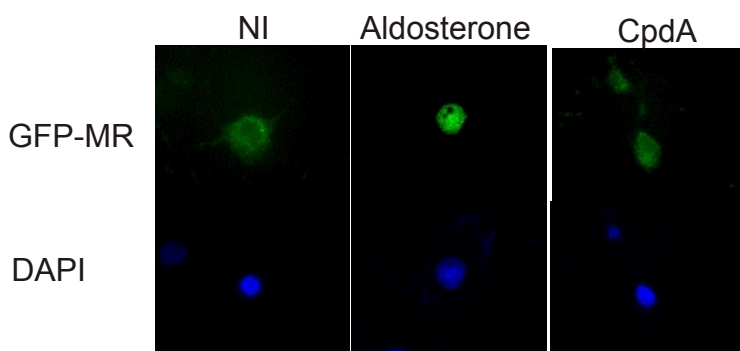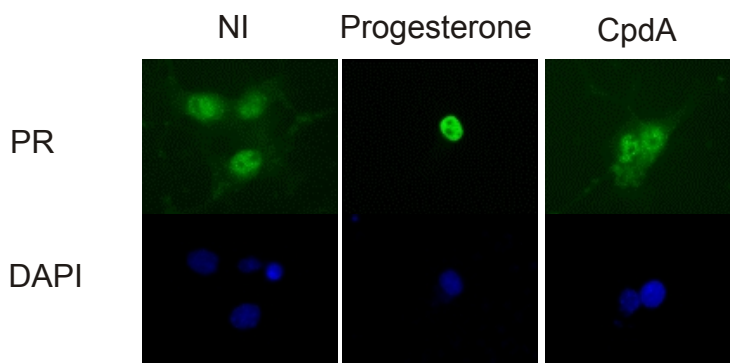

**B**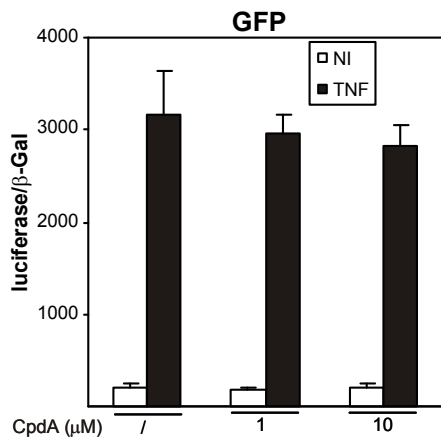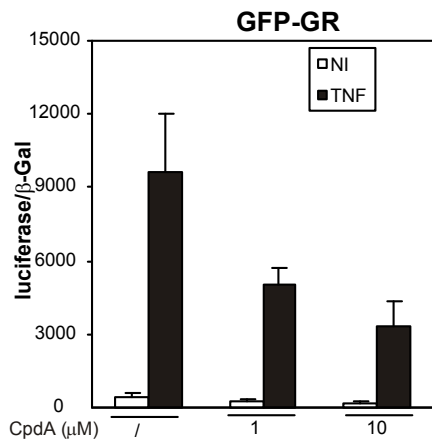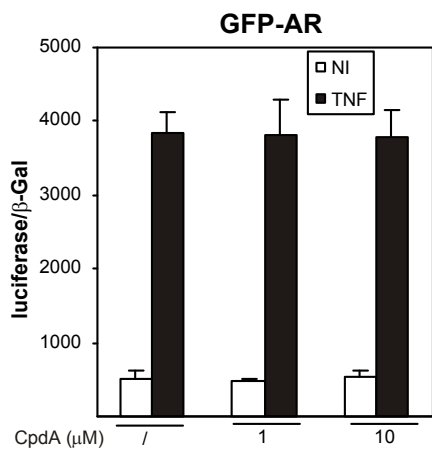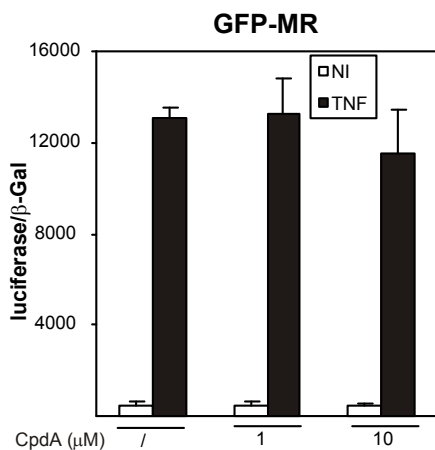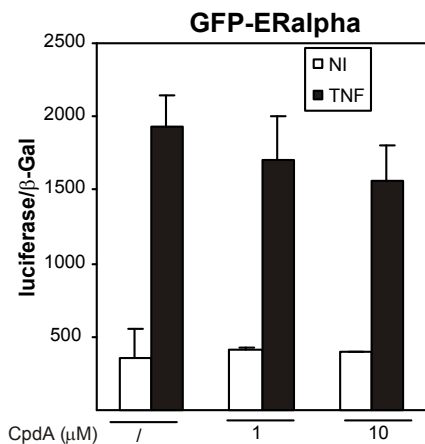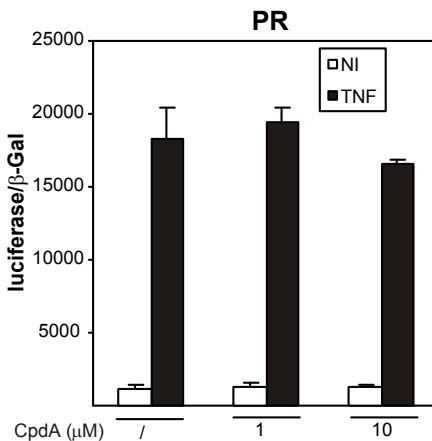

Supplement: pnas_0505554102_3.pdf [file pnas_0505554102_3.pdf]
